# Supplementary material for: Comparison of Intraductal RFA Plus Stent versus Stent-Only Treatment for Unresectable Perihilar Cholangiocarcinoma—A Systematic Review and Meta-Analysis
Source: MDPI journal article supplement (doi:10.3390/cancers14092079), 2022-04-21
Supplement: s1 [file s1]

## **Search strategy**

### Embase

('bile duct cancer'/exp OR (klatskin\* OR cholangiocarcinom\* OR ((bile-duct OR bile-tract OR biliar\* OR cholangio\* OR gall-duct\*) NEAR/3 (carcinom\* OR cancer\* OR neoplas\* OR tumo\* OR cholangiocarcinom\*))) :ab,ti) AND ('radiofrequency ablation'/exp OR (radiofrequency-ablation OR radio-frequency-ablation OR RFA):ab,ti) AND ('stent'/de OR 'biliary stent'/de OR 'metal stent'/exp OR 'nitinol stent'/exp OR 'plastic stent'/de OR 'self expanding stent'/exp OR (stent\*):ab,ti)

### Medline (Ovid)

(exp Biliary Tract Neoplasms/ OR (klatskin\* OR cholangiocarcinom\* OR ((bile-duct OR bile-tract OR biliar\* OR cholangio\* OR gall-duct\*) ADJ3 (carcinom\* OR cancer\* OR neoplas\* OR tumo\* OR cholangiocarcinom\*))) .ab,ti.) AND (exp Radiofrequency Ablation/ OR (radiofrequency-ablation OR radio-frequency-ablation OR RFA).ab,ti.) AND (exp Stents/ OR (stent\*).ab,ti.)

### Web of Science

TS=(((klatskin\* OR cholangiocarcinom\* OR ((bile-duct\* OR bile-tract\* OR biliar\* OR cholangio\* OR gall-duct\*) NEAR/2 (carcinom\* OR cancer\* OR neoplas\* OR tumo\* OR cholangiocarcinom\*)))) AND ( (((radiofrequency OR radio-frequency) NEAR/2 (ablation\*)) OR RFA)) AND ((stent\*)))

### Cochrane

((klatskin\* OR cholangiocarcinom\* OR ((bile-duct OR bile-tract OR biliar\* OR cholangio\* OR gall-duct\*) NEAR/3 (carcinom\* OR cancer\* OR neoplas\* OR tumo\* OR cholangiocarcinom\*))) :ab,ti) AND ( (radiofrequency-ablation OR radio-frequency-ablation OR RFA):ab,ti) AND ((stent\*):ab,ti)

### Google Scholar

klatskin|cholangiocarcinoma|'bile|gall duct|tract  
carcinoma|cancer|neoplasm|tumor|tumour|'biliary carcinoma|cancer|neoplasm|tumor|tumour'  
'radiofrequency|RF ablation'|RFA stent|stents

**Supplementary Table S1.** Characteristics and outcome measures of studies describing survival and/or stent patency including the single arm studies, that were included for secondary endpoint analysis only.

| Study         | Country        | Period                              | Study design    |              | CCA type       | Intervention                | RFA setting            | Stent type | N (RFA) | Palliative treatment |         | Outcome                                 |                                         |
|---------------|----------------|-------------------------------------|-----------------|--------------|----------------|-----------------------------|------------------------|------------|---------|----------------------|---------|-----------------------------------------|-----------------------------------------|
|               |                |                                     | Data collection | Design       |                |                             |                        |            |         | pCTx                 | Other   | Survival                                | Stent patency                           |
| Andrasina [1] | Czech Republic | 2010-2019                           | Prospective     | RCT          | Bismuth II-IV  | PTC                         | 10W for 90-120s, Habib | ucSEMS     | 21      | 14                   | BTx: 18 | Median 14.7 months (95% CI, 9.6 – 16.6) | Median 9.6 months (range: 5.2 – 12.2) * |
| Bhadauria [2] | India          | NR                                  | Prospective     | Cohort       | Bismuth I-IV   | ERCP                        | 8-10W for 120s, Habib  | Plastic    | 10      | NR                   | NR      | Median 15.8 months (95% CI, 8.5 – 23.1) | NR                                      |
| Bokemeyer [3] | Germany        | 2006-2011 controls, 2012-2017 cases | Retrospective   | Case control | Bismuth III-IV | ERCP                        | 8-10W for 90s, Habib   | Both       | 20      | 6                    | NR      | Mean 11.3 months (+/- 1.9)              | NR                                      |
| Buerlein [4]  | USA            | 2011-2018                           | Retrospective   | Cohort       | Bismuth I-IV   | ERCP                        | NR                     | NR         | 20      | NR                   | PDT: 2  | Median 10 months (95% CI, 8.5 – 36.8)   | NR                                      |
| Cui [5, 6]    | China          | 2013-2015                           | Retrospective   | Cohort       | Bismuth I-IV   | PTC                         | 10W for 90s, Habib     | ucSEMS     | 46      | NR                   | NR      | NR                                      | Median 7.6 months (95% CI 6.8-9.2)      |
| Gao [7]       | China          | 2013-2017                           | Prospective     | RCT          | Bismuth I-III  | ERCP, repeat after 3 months | 7-10W for 90s, Habib   | Plastic    | 25      | NR                   | NR      | HR 0.414 (95% CI, 0.025 – 0.762)        | NR                                      |

|               |             |           |               |        |                |      |                              |                  |        |             |          |                                       |                                       |
|---------------|-------------|-----------|---------------|--------|----------------|------|------------------------------|------------------|--------|-------------|----------|---------------------------------------|---------------------------------------|
| Gou [8]       | China       | 2013-2018 | Retrospective | Cohort | Bismuth I-IV   | PTC  | 10W for 120s, Habib          | ucSEMS           | 18     | NR          | HAIC: 18 | HR 1.48 (95% CI, 0.874 – 2.507)       | HR 1.173 (95% CI, 0.685 – 2.011)      |
| Han [9]       | South Korea | NR        | Both          | Single | Bismuth III-IV | ERCP | 7W for 120s, ELRA Starmed    | Both             | 21     | 2           | NR       | Median 4.9 months (range: 1.7 – 16.1) | NR                                    |
| Kang [10]     | South Korea | NR        | Prospective   | RCT    | Bismuth II-IV  | ERCP | 7W for 60-120s, ELRA Starmed | Plastic → ucSEMS | 13     | NR          | NR       | NR                                    | Median 5.9 months (2.0 – 9.8)         |
| Laleman [11]  | Belgium     | 2014-2015 | Prospective   | Single | Bismuth III-IV | ERCP | 7-10W for 120s, ELRA Starmed | Both             | 9      | NR          | NR       | NR                                    | Median 4.6 months (range: 1.7 – 11.2) |
| Laquière [12] | France      | NR        | Retrospective | Single | Bismuth I-IV   | ERCP | 10W for 90s, Habib           | Both             | 12     | 3           | NR       | Mean 12.3 months (range: 3 – 31)      | NR                                    |
| Lee [13]      | South Korea | NR        | Prospective   | Single | NR             | ERCP | ELRA Starmed                 | NR               | 20     | NR          | NR       | NR                                    | Median 8 months                       |
| Sampath [14]  | USA         | 2010-2015 | Retrospective | Cohort | Bismuth I-IV   | ERCP | NR                           | Plastic SEMS     | 8<br>2 | 8 (+/- RTx) | NR       | Median 11.8 months                    | NR                                    |
| Tal [15]      | Germany     | 2012-2013 | Prospective   | Single | Bismuth IV     | ERCP | 8-10W for 90 second, Habib   | Plastic          | 7      | NR          | NR       | Median 6.2 months (IQR: 1.3 – 10.3)   | NR                                    |
| Wang [16]     | China       | 2013-2015 | Prospective   | Single | Bismuth III-IV | PTC  | 6-10W for 90-120s, Habib     | Metal            | 9      | 2           | NR       | Median 5.3 months (95% CI, 2.5 – 8.1) | NR                                    |

|          |       |           |               |                |              |      |                           |      |    |    |    |                                         |    |
|----------|-------|-----------|---------------|----------------|--------------|------|---------------------------|------|----|----|----|-----------------------------------------|----|
| Xia [17] | China | 2012-2019 | Retrospective | Matched Cohort | Bismuth I-IV | ERCP | 10-12W for 60-120s, Habib | Both | 47 | NR | NR | Median 10.5 months (95% CI, 8.2 – 12.8) | NR |
|----------|-------|-----------|---------------|----------------|--------------|------|---------------------------|------|----|----|----|-----------------------------------------|----|

\* In 6 out of the 20 patients that received a stent (time to occlusion)

**Supplementary Table S2.** Newcastle-Ottawa Quality assessment scale for cohort studies. *Good quality: 7-9, Fair quality: 4-6, Poor quality: 0-3.*

| Article                                                            | Bhadauria | Bokemeyer | Buerlein | Cui | Gou | Sampath | Xia |
|--------------------------------------------------------------------|-----------|-----------|----------|-----|-----|---------|-----|
| <b>Selection</b>                                                   |           |           |          |     |     |         |     |
| 1. Representativeness of the exposed cohort                        |           |           |          |     |     |         |     |
| a. Truly representative                                            |           | X         | X        | X   | X   | X       | X   |
| b. Somewhat representative                                         |           |           |          |     |     |         |     |
| c. Selected groups                                                 |           |           |          |     |     |         |     |
| d. No description of derivation of cohort                          | X         |           |          |     |     |         |     |
| 2. Selection of non-exposed cohort                                 |           |           |          |     |     |         |     |
| a. Drawn from same community                                       |           | X         | X        | X   | X   | X       | X   |
| b. Drawn from different source                                     |           |           |          |     |     |         |     |
| c. No description of derivation of non-exposed cohort              | X         |           |          |     |     |         |     |
| 3. Ascertainment of exposure                                       |           |           |          |     |     |         |     |
| a. Secure record                                                   |           | X         | X        | X   | X   | X       | X   |
| b. Structured interview                                            |           |           |          |     |     |         |     |
| c. Written self report                                             |           |           |          |     |     |         |     |
| d. No description                                                  | X         |           |          |     |     |         |     |
| 4. Demonstration that outcome was not present at start of study    |           |           |          |     |     |         |     |
| a. Yes                                                             | X         | X         | X        | X   | X   | X       | X   |
| b. No                                                              |           |           |          |     |     |         |     |
| <b>Comparability</b>                                               |           |           |          |     |     |         |     |
| 1. Comparability of cohorts on the basis of the design or analysis |           |           |          |     |     |         |     |
| a. The study controls for extent of disease                        |           | X         | X        | X   | X   | X       | X   |
| b. Study controls for any additional factor                        |           | X         | X        | X   | X   | X       | X   |
| <b>Exposure</b>                                                    |           |           |          |     |     |         |     |
| 1. Ascertainment of exposure                                       |           |           |          |     |     |         |     |
| a. Independent blind assessment                                    |           |           |          |     |     |         |     |
| b. Record linkage                                                  | X         | X         | X        | X   | X   | X       | X   |
| c. Self report                                                     |           |           |          |     |     |         |     |
| d. No description                                                  |           |           |          |     |     |         |     |
| 2. Was FU long enough for outcomes to occur?                       |           |           |          |     |     |         |     |
| a. Yes                                                             | X         | X         | X        | X   | X   | X       | X   |
| b. No                                                              |           |           |          |     |     |         |     |
| 3. Adequacy of FU of cohort                                        |           |           |          |     |     |         |     |
| a. Complete FU                                                     | X         | X         | X        | X   |     |         | X   |
| b. Subject lost to FU unlikely to introduce bias                   |           |           |          |     |     |         |     |
| c. FU rate <50% and no description                                 |           |           |          |     |     | X       |     |
| d. No statement                                                    |           |           |          |     | X   |         |     |
| <b>Score</b>                                                       | 4         | 9         | 9        | 9   | 8   | 8       | 9   |

**Supplementary Table S3.** Modified Jadad scale for RCTs. *Good quality: 6-8, Fair quality: 4-5, Poor quality: 0-3.*

|                                                                    | <b>Andrasina</b> | <b>Gao</b>    | <b>Kang **</b> |
|--------------------------------------------------------------------|------------------|---------------|----------------|
| Was the study described as randomized?                             | Yes              | Yes           | Yes            |
| Was the method of randomization appropriate?                       | Yes              | Yes           | Yes            |
| Was the study described as blinded?                                | No               | No*           | No             |
| Was the method of blinding appropriate?                            | Not described    | Not described | Not described  |
| Was there as description of withdrawals and drop-outs?             | Yes              | Yes           | Yes            |
| Was there a clear description of the inclusion/exclusion criteria? | Yes              | Yes           | Yes            |
| Was the method used to assess adverse effects described?           | Yes              | Yes           | Yes            |
| Was the method of statistical analysis described?                  | Yes              | Yes           | Yes            |
| <b>Score:</b>                                                      | <b>6</b>         | <b>6</b>      | <b>6</b>       |

\* = Patients and physicians were not blinded, but those responsible for data collection and patients follow-up were.

\*\* = Only included in secondary endpoint analysis

**Supplementary Table S4.** The Joanna Briggs Institute Critical Appraisal Tool for Case Series included in secondary endpoint analysis.

|                                                                                                                  | <b>Han</b> | <b>Laquière</b> | <b>Laleman</b> | <b>Lee</b> | <b>Tal</b> | <b>Wang</b> |
|------------------------------------------------------------------------------------------------------------------|------------|-----------------|----------------|------------|------------|-------------|
| 1. Were there clear criteria for inclusion in the case series?                                                   | Yes        | Yes             | Yes            | Yes        | Yes        | Yes         |
| 2. Was the condition measured in a standard, reliable way for all participants included in the case series?      | Yes        | Yes             | Yes            | Unknown    | Yes        | Yes         |
| 3. Were valid methods used for identification of the condition for all participants included in the case series? | Yes        | Yes             | Yes            | Unknown    | Yes        | Yes         |
| 4. Did the case series have consecutive inclusion of participants?                                               | No         | Yes             | Unknown        | Unknown    | No         | No          |
| 5. Did the case series have complete inclusion of participants?                                                  | NA         | NA              | NA             | NA         | NA         | NA          |
| 6. Was there clear reporting of the demographics of the participants in the study?                               | Yes        | Yes             | Yes            | No         | Yes        | Yes         |
| 7. Was there clear reporting of clinical information of the participants?                                        | Yes        | Yes             | Yes            | No         | Yes        | Yes         |
| 8. Were the outcomes or follow up results of cases clearly reported?                                             | Yes        | Yes             | Yes            | No         | Yes        | Yes         |
| 9. Was there clear reporting of the presenting site(s)/clinic(s) demographic information?                        | Yes        | Yes             | Yes            | No         | Yes        | Yes         |
| 10. Was statistical analysis appropriate?                                                                        | Yes        | Yes             | Yes            | Yes        | Yes        | Yes         |

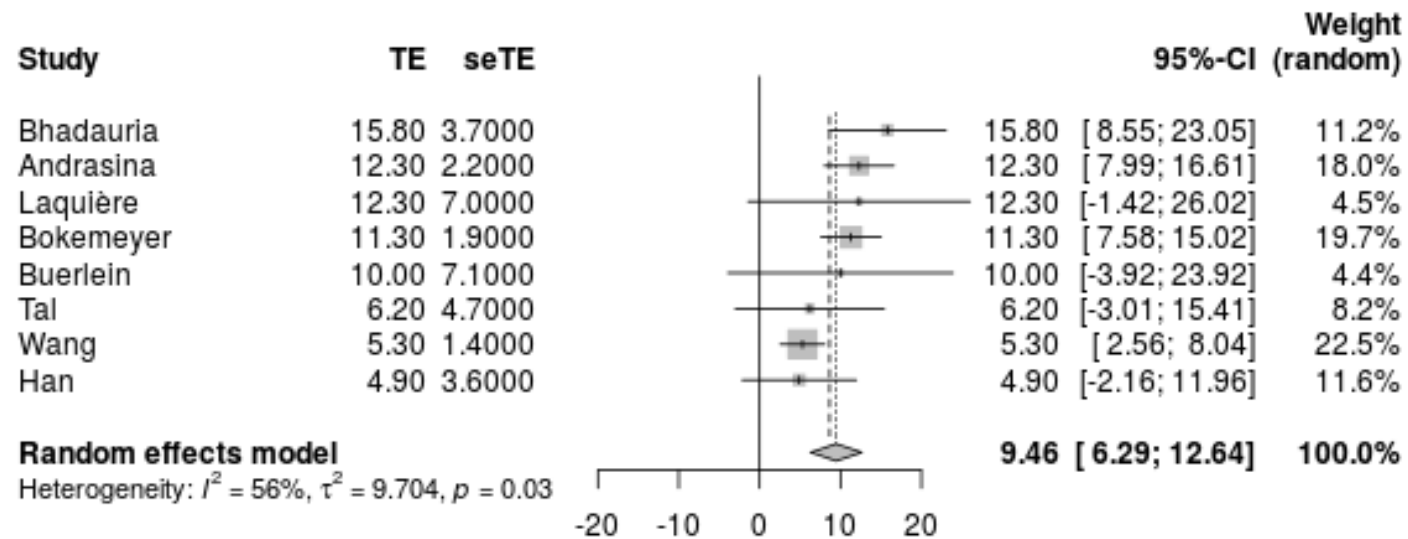

**Supplementary Figure S1.** Pooled median survival in months for RFA+stent treatment for studies reporting this in single arm studies specifically for pCCA in combination with articles included in the primary meta-analysis



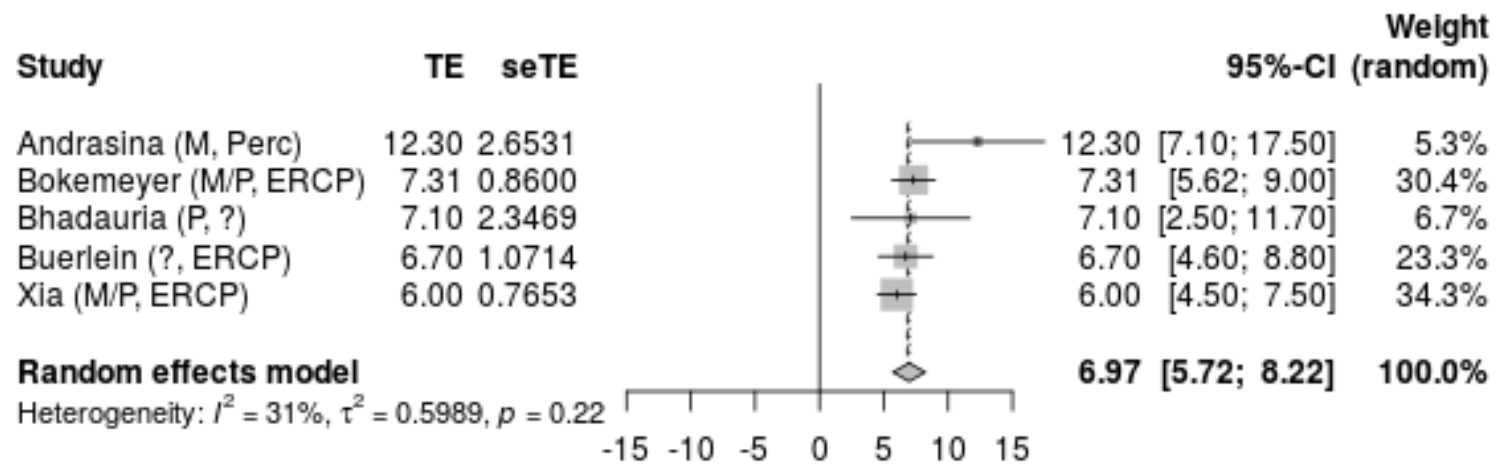

**Supplementary Figure S2.** Pooled median survival in months for stent only treatment for all studies included in this primary meta-analysis, with stent type and method of stent placement  
*M = ucSEMS, P = Plastic stents, Perc = Percutaneous stent, ? = Unknown*

**Supplementary Table S5.** Adverse events reported in included articles.

| Study     | Analysis                     |            | No. per group | Overall AE rate | Cholangitis | Cholecystitis | Pancreatitis | Liver abscess | Bleeding | Abdominal pain    | Perforation       | P-value |
|-----------|------------------------------|------------|---------------|-----------------|-------------|---------------|--------------|---------------|----------|-------------------|-------------------|---------|
| Andrasina | Per patient                  | RFA        | 21            | NR              | NR          | NR            | NR           | NR            | NR       | NR                | NR                | 0.062   |
|           |                              | Stent-only | 22            |                 |             |               |              |               |          |                   |                   |         |
| Bhadauria | Per patient                  | RFA        | 17            | NR              | 11.8%       | NR            | NR           | NR            | 5.9%     | More often in RFA | NR                | NR      |
|           |                              | Stent-only | 15            | NR              | 26.7%       | NR            | NR           | NR            | 0%       |                   | NR                | NR      |
| Bokemeyer | Per procedure                | RFA        | 54            | 18.5%           | 11.1%       | 3.7%          | 1.9%         | NR            | NR       | NR                | 1.9% (intestinal) | NR      |
|           |                              | Stent-only | NR            | NR              | NR          | NR            | NR           | NR            | NR       | NR                | NR                |         |
| Buerlein  | Per patient                  | RFA        | 20            | NR              | 40%         | NR            | NR           | 10%           | NR       | 10%               | NR                | >0.05   |
|           |                              | Stent-only | 29            | NR              | 41.4%       | NR            | NR           | 20.7%         | NR       | 6.9%              | NR                |         |
| Cui       | Per procedure                | RFA        | 50            | NR              | 20%         | NR            | 2%           | NR            | 14%      | 38%               | NR                | 0.159   |
|           |                              | Stent-only | 39            | NR              | 15.4%       | 2.6%          | 2.6%         | NR            | 5.2%     | 20.5%             | NR                |         |
| Gao       | Per patient overall          | RFA        | 87            | 27.6%           | 11.5%       | 10.3%         | 4.6%         | 1.1%          | 1.1%     | NR                | NR                | 0.211   |
|           |                              | Stent-only | 87            | 19.5%           | 10.3%       | 0%            | 5.7%         | 0%            | 3.4%     | NR                | NR                |         |
|           | Per patient in pCCA specific | RFA        | 25            | NR              | NR          | 28%           | NR           | NR            | NR       | NR                | NR                | NR      |
|           |                              | Stent-only | 22            | NR              | NR          | 0%            | NR           | NR            | NR       | NR                | NR                |         |
| Gou       | Per patient                  | RFA        | 64            | 67.2%           | 12.5%       | NR            | 10.9%        | NR            | 14.1%    | 21.9%             | 1.6%              | >0.05   |
|           |                              | Stent-only | 71            | 60.6%           | 15.5%       | NR            | 8.5%         | NR            | 8.5%     | 23.9%             | 1.4%              |         |
| Kang      | Per patient                  | RFA        | 15            | NR              | 20%         | 6.7%          | 0%           | 0%            | 0%       | 20%               | 0%                | >0.05   |
|           |                              | Stent-only | 15            | NR              | 33.3%       | 6.7%          | 6.7%         | 6.7%          | 0%       | 0%                | 0%                |         |

|         |             |            |     |       |       |      |      |    |      |    |                  |       |
|---------|-------------|------------|-----|-------|-------|------|------|----|------|----|------------------|-------|
| Lee     | Per patient | RFA        | 21  | NR    | NR    | NR   | NR   | NR | NR   | NR | NR               | >0.05 |
|         |             | Stent-only | 21  |       |       |      |      |    |      |    |                  |       |
| Sampath | Per patient | RFA        | 10  | NR    | 30%   | NR   | NR   | NR | NR   | NR | 0% (bile leak)   | NR    |
|         |             | Stent-only | 15  | NR    | 0%    | NR   | NR   | NR | NR   | NR | 6.7% (bile leak) |       |
| Xia *   | Per patient | RFA        | 124 | 19.5% | 6.5%  | 4.8% | 8.9% | NR | 1.6% | NR | 0.8%             | 0.804 |
|         |             | Stent-only | 396 | 18.5% | 14.2% | 0.1% | 5.1% | NR | 1.2% | NR | 0%               |       |

Overall = not specified for cholangiocarcinoma patients, specific = pCCA only.

\* = unmatched cohort

## Supplementary References

1. Andrasina, T.; Rohan, T.; Panek, J.; Kovalcikova, P.; Kunovsky, L.; Ostrizkova, L.; Valek, V. The combination of endoluminal radiofrequency ablation and metal stent implantation for the treatment of malignant biliary stenosis—Randomized study. *Eur. J. Radiol.* **2021**, *142*, 109830. <https://doi.org/10.1016/j.ejrad.2021.109830>.
2. Bhadauria, A.S.; Mohindra, S.; Pandey, G.; Saraswat, V. Early experience with endobiliary radiofrequency ablation (endo-rfa) in patients with unresectable malignant hilar biliary obstruction. *Indian J. Gastroenterol.* **2020**, *34*, 390. <https://doi.org/10.1007/s12664-020-01133-9>.
3. Bokemeyer, A.; Matern, P.; Bettenworth, D.; Cordes, F.; Nowacki, T.M.; Heinzow, H.; Kabar, I.; Schmidt, H.; Ullerich, H.; Lenze, F. Endoscopic radiofrequency ablation prolongs survival of patients with unresectable hilar cholangiocellular carcinoma—A case-control study. *Sci. Rep.* **2019**, *9*, 13685. <https://doi.org/10.1038/s41598-019-50132-0>.
4. Buerlein, R.; Strand, D.S.; Patrie, J.T.; Sauer, B.G.; Shami, V.M.; Scheiman, J.M.; Zaydfudim, V.M.; Bauer, T.W.; Adams, R.B.; Wang, A.Y. 544 ercp-directed biliary ablation prolongs survival in patients with unresectable perihilar cholangiocarcinoma compared to stenting alone. *Gastrointest. Endosc.* **2019**, *89*, AB91–AB92. <https://doi.org/10.1016/j.gie.2019.04.081>.
5. Cui, W.; Wang, Y.; Fan, W.; Lu, M.; Zhang, Y.; Yao, W.; Li, J. Comparison of intraluminal radiofrequency ablation and stents vs. Stents alone in the management of malignant biliary obstruction. *Int. J. Hyperth.* **2017**, *33*, 853–861. <https://doi.org/10.1080/02656736.2017.1309580>.
6. Cui, W.; Li, J. Iddf2019-abs-0077 percutaneous endobiliary radiofrequency ablation and self-expandable metal stent placement versus stent placement alone for malignant biliary obstruction. *Gut* **2019**, *68*, A129. <https://doi.org/10.1136/gutjnl-2019-IDDFAbstracts.255>.
7. Gao, D.J.; Yang, J.F.; Ma, S.R.; Wu, J.; Wang, T.T.; Jin, H.B.; Xia, M.X.; Zhang, Y.C.; Shen, H.Z.; Ye, X.; et al. Endoscopic radiofrequency ablation plus plastic stent placement versus stent placement alone for unresectable extrahepatic biliary cancer: A multicenter randomized controlled trial. *Gastrointest. Endosc.* **2021**, *94*, 91–100. <https://doi.org/10.1016/j.gie.2020.12.016>.
8. Gou, Q.; Wu, L.; Cui, W.; Mo, Z.; Zeng, D.; Gan, L.; He, J.; Mai, Q.; Shi, F.; Chen, M.; et al. Stent placement combined with intraluminal radiofrequency ablation and hepatic arterial infusion chemotherapy for advanced biliary tract cancers with biliary obstruction: A multicentre, retrospective, controlled study. *Eur. Radiol.* **2021**, *31*, 5851–5862. <https://doi.org/10.1007/s00330-021-07716-0>.
9. Han, S.Y.; Kim, D.U.; Kang, D.H.; Baek, D.H.; Lee, T.H.; Cho, J.H. Usefulness of intraductal rfa in patients with malignant biliary obstruction. *Medicine* **2020**, *99*, e21724. <https://doi.org/10.1097/MD.00000000000021724>.
10. Kang, H.; Han, S.Y.; Cho, J.H.; Kim, E.J.; Kim, D.U.; Yang, J.K.; Jeon, S.; Park, G.; Lee, T.H. Efficacy and safety of temperature-controlled intraductal radiofrequency ablation in advanced malignant hilar biliary obstruction: A pilot multicenter randomized comparative trial. *J. Hepatobiliary Pancreat. Sci.* **2021**, *00*, 1–10. <https://doi.org/10.1002/jhbp.1082>.
11. Laleman, W.; van der Merwe, S.; Verbeke, L.; Vanbeckevoort, D.; Aerts, R.; Prenen, H.; van Cutsem, E.; Verslype, C. A new intraductal radiofrequency ablation device for inoperable biliopancreatic tumors complicated by obstructive jaundice: The ignite-1 study. *Endoscopy* **2017**, *49*, 977–982. <https://doi.org/10.1055/s-0043-113559>.
12. Laquiere, A.; Boustiere, C.; Leblanc, S.; Penaranda, G.; Desilets, E.; Prat, F. Safety and feasibility of endoscopic biliary radiofrequency ablation treatment of extrahepatic cholangiocarcinoma. *Surg. Endosc.* **2016**, *30*, 1242–1248. <https://doi.org/10.1007/s00464-015-4322-7>.
13. Lee, Y.N.; Moon, J.H.; Park, J.K.; Jo, S.J.; Lee, T.H. Efficacy of endobiliary radiofrequency ablation plus stenting versus stenting alone in patients with inoperable hilar cholangiocarcinoma. *Gut Liver* **2019**, *13*, 19.

14. Sampath, K.; Hyder, S.M.; Gardner, T.; Gordon, S.R. The effect of endoscopic radiofrequency ablation on survival in patients with unresectable perihilar cholangiocarcinoma. *Gastrointest. Endosc.* **2016**, *83*, AB595.
15. Tal, A.O.; Vermehren, J.; Friedrich-Rust, M.; Bojunga, J.; Sarrazin, C.; Zeuzem, S.; Trojan, J.; Albert, J.G. Intraductal endoscopic radiofrequency ablation for the treatment of hilar non-resectable malignant bile duct obstruction. *World J. Gastrointest. Endosc.* **2014**, *6*, 13–19. <https://doi.org/10.4253/wjge.v6.i1.13>.
16. Wang, Y.; Cui, W.; Fan, W.; Zhang, Y.; Yao, W.; Huang, K.; Li, J. Percutaneous intraductal radiofrequency ablation in the management of unresectable bismuth types iii and iv hilar cholangiocarcinoma. *Oncotarget* **2016**, *7*, 53911–53920. <https://doi.org/10.18632/oncotarget.10116>.
17. Xia, M.X.; Wang, S.P.; Yuan, J.G.; Gao, D.J.; Ye, X.; Wang, T.T.; Wu, J.; Zhou, D.X.; Hu, B. Effect of endoscopic radiofrequency ablation on the survival of patients with inoperable malignant biliary strictures: A large cohort study. *J. Hepatobiliary Pancreat. Sci.* **2021**, *00*, 1–10. <https://doi.org/10.1002/jhbp.960>.
